# Supplementary material
Source: Copernicus journal article supplement (doi:10.5194/esurf-14-433-2026)

Movies Movie\_S1\_Agzybir.mp4 to Movie\_S19\_West\_Cheildag\_Complex\_3.mp4: short movies for mud volcanoes 1 to 19 from Table 1 of the article.

Table S1: GPS points of sticks planted on the Otman Bozdaq (AZ-25-OB) and Durandag (AZ-25-STI) mud volcanoes

| Campaign code | Sticks | Latitude [dec.°] | Longitude [dec.°] |
|---------------|--------|------------------|-------------------|
| AZ-25-OB-     | W      | 40.237889        | 49.510556         |
| AZ-25-OB-     | E      | 40.237972        | 49.511222         |
| AZ-25-STI-    | 1      | 40.160222        | 49.146917         |
| AZ-25-STI-    | 2      | 40.162472        | 49.148000         |
| AZ-25-STI-    | 3      | 40.164917        | 49.150667         |
| AZ-25-STI-    | 4      | 40.163889        | 49.153639         |
| AZ-25-STI-    | 5      | 40.156000        | 49.169222         |
| AZ-25-STI-    | 6      | 40.149694        | 49.175000         |

Figure S1: Photos of sticks AZ-25-OB- W1 to W6 and E3 to E6 on Otman Bozdağ.

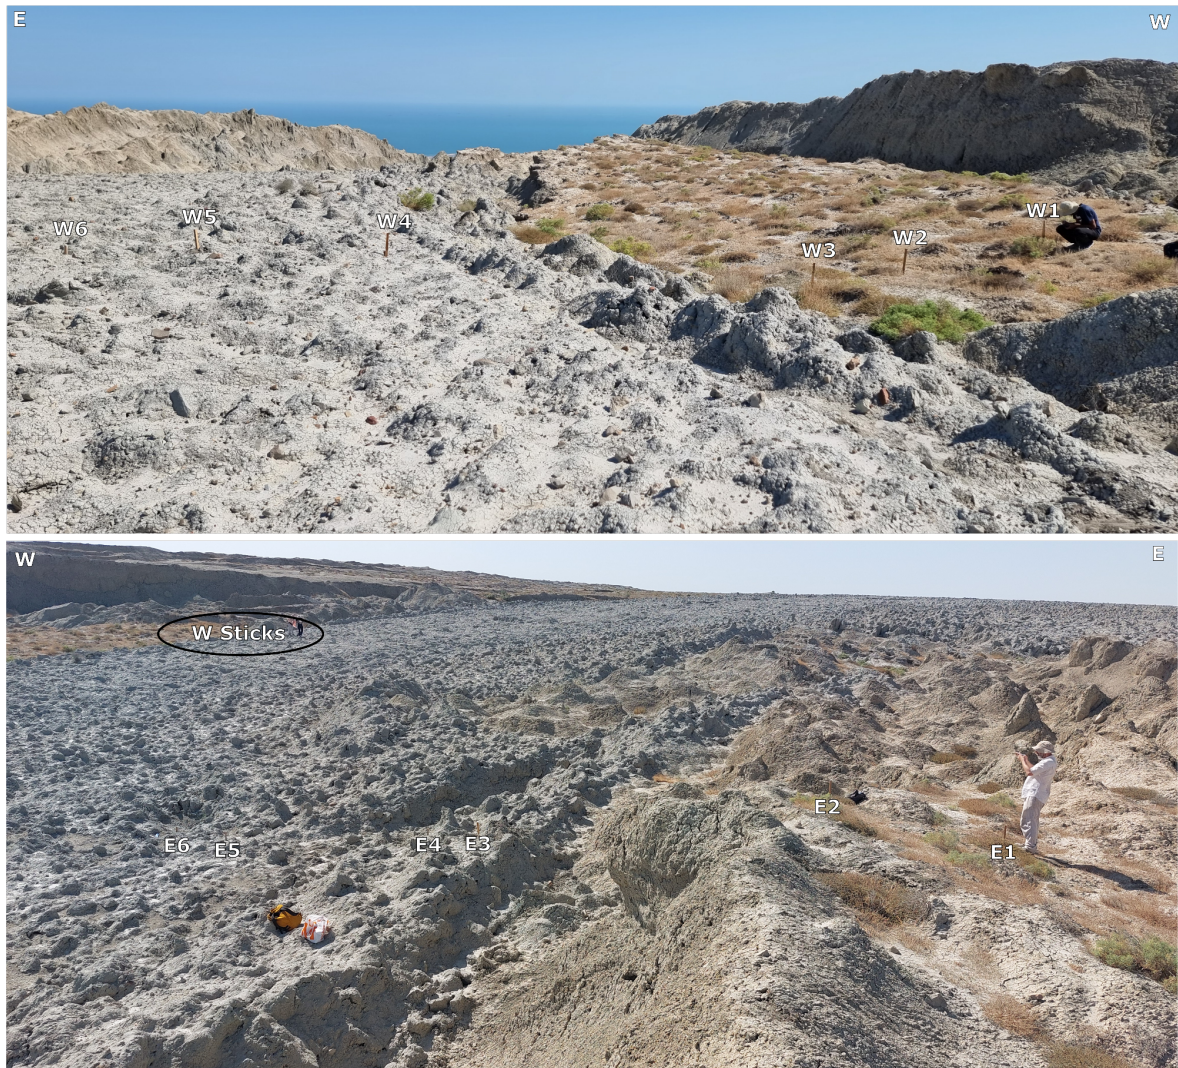



Figure S2: Photos of aligned sticks AZ-25-OB- W1 to W6 and E2 to E6 on Otman Bozdağ.

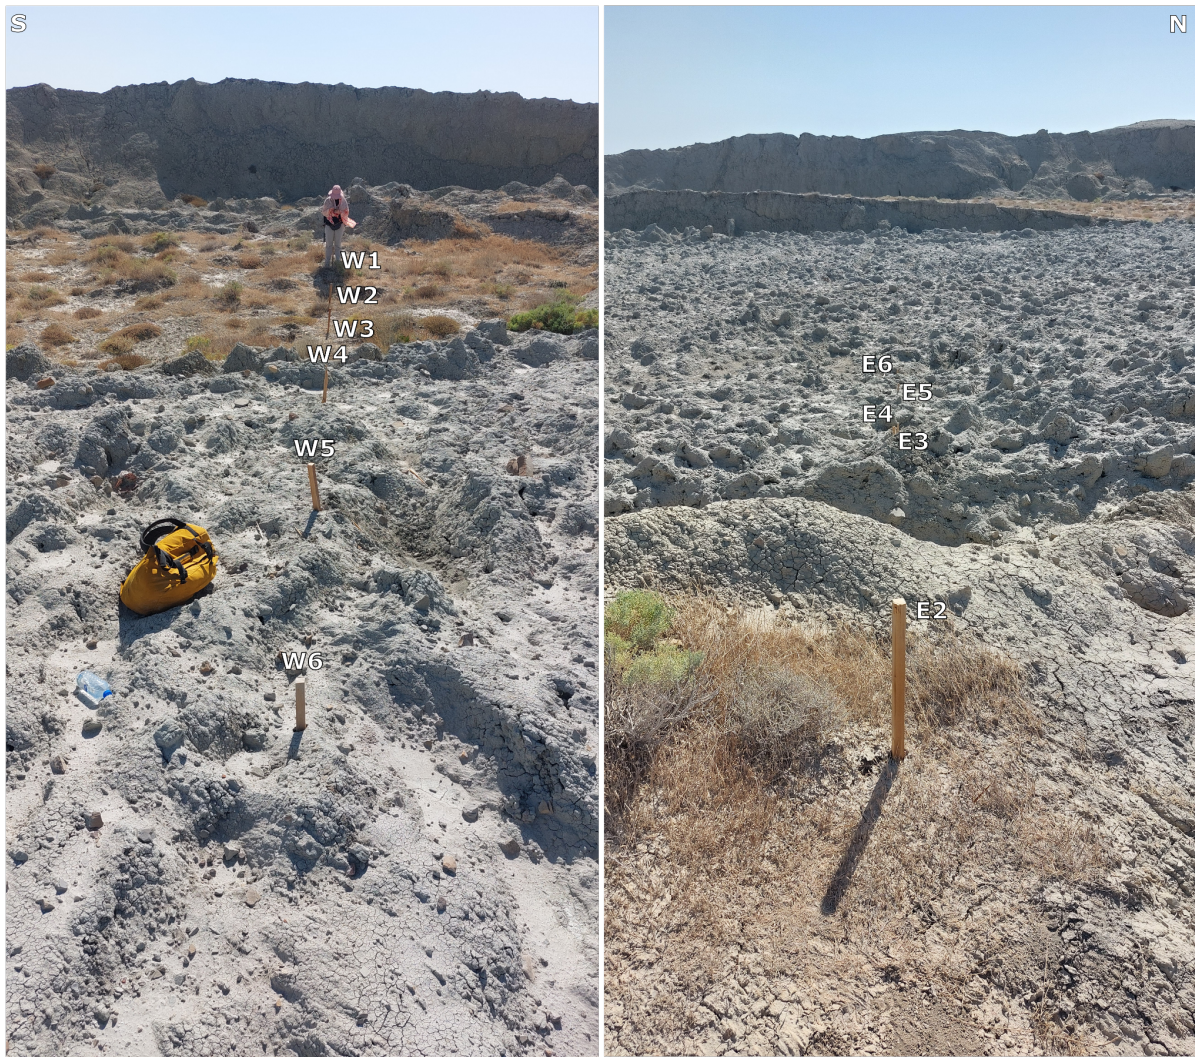



Figure S3: Photos of sticks AZ-25-STI-1 to 6 on Durandag

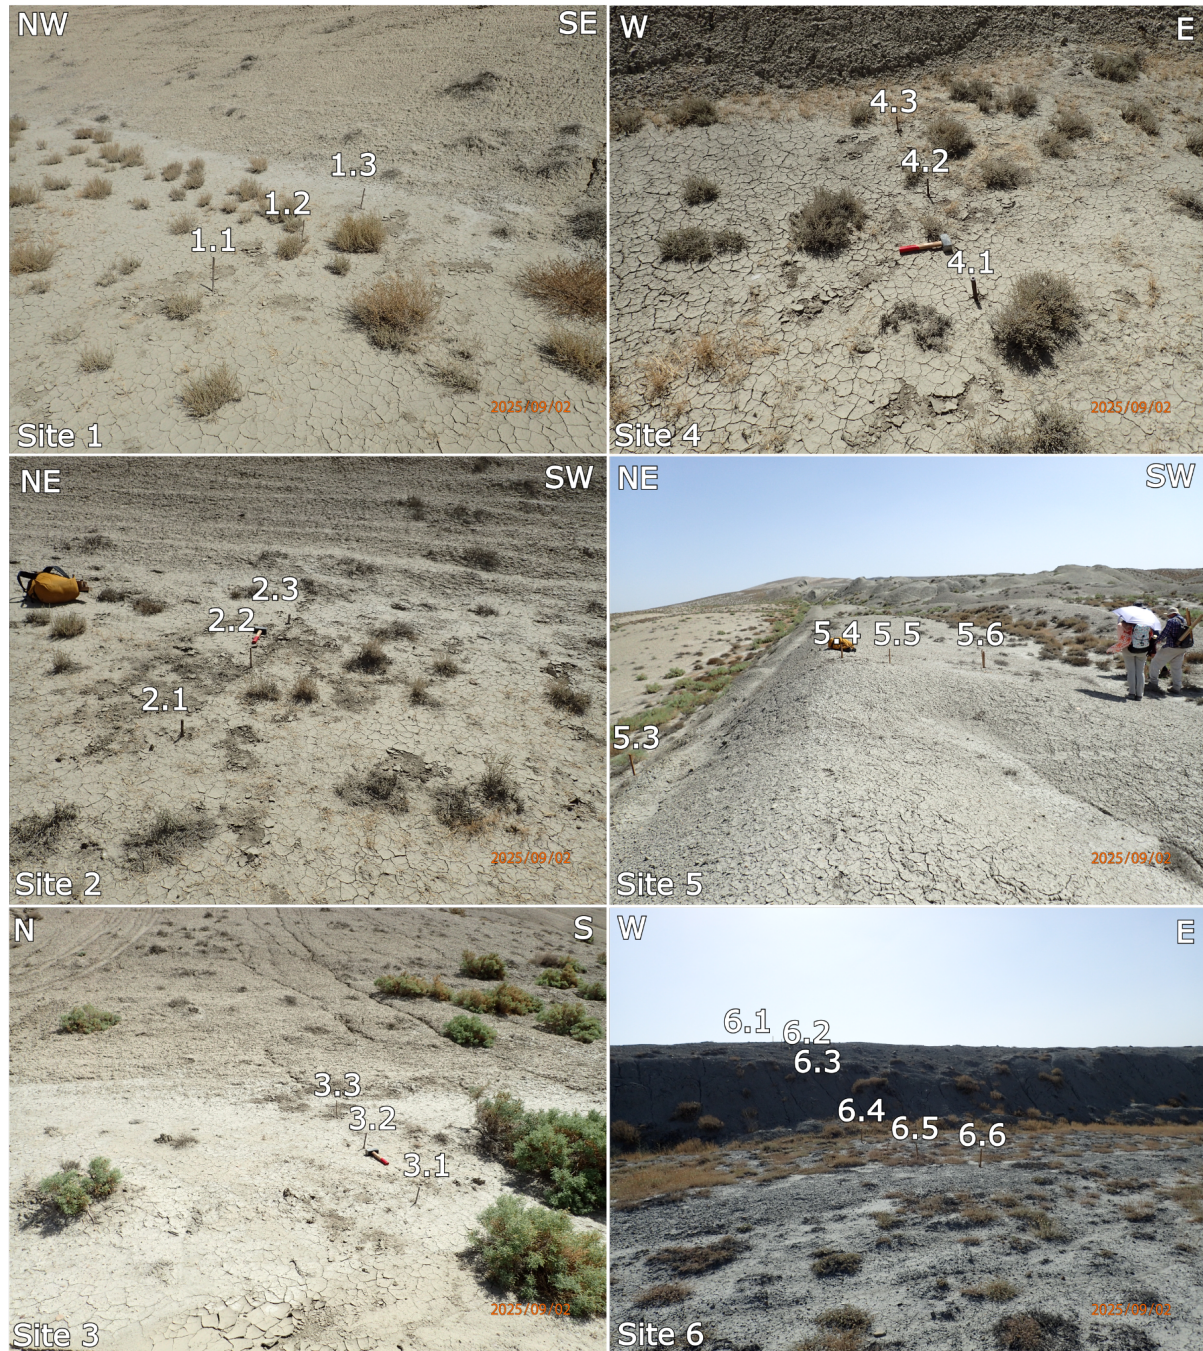

Supplement: Supplementary file 1 [file Supplement_final.pdf › Supplements/Supplement_final.pdf]
