# Supplementary material
Source: Copernicus journal article supplement (doi:10.5194/esurf-14-433-2026)
Supplement: Supplementary file [file esurf-14-433-2026-supplement-title-page.pdf › esurf-14-433-2026-supplement-title-page.pdf]

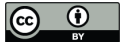

## *Supplement of*

# **Mud volcano dynamics in Azerbaijan: the overlooked role of creeping mud flows in landscape evolution**

**Caroline Fenske et al.**

*Correspondence to:* Caroline Fenske (fenske@ig.cas.cz)

- esurf-14-433-2026-supplement-title-page.pdf
- Supplements
  - Movie\_S10\_Kyurdamich.mp4
  - Movie\_S11\_Lokbathan.mp4
  - Movie\_S12\_Melickchobanly.mp4
  - Movie\_S13\_Otman\_Bozdaq.mp4
  - Movie\_S14\_Khamamdag.mp4
  - Movie\_S15\_Goturdag.mp4
  - Movie\_S16\_Shakikhan.mp4
  - Movie\_S17\_West\_Cheildag\_complex\_1.mp4
  - Movie\_S18\_West\_Cheildag\_complex\_2.mp4
  - Movie\_S19\_West\_Cheildag\_Complex\_3.mp4
  - Movie\_S1\_Agzybir.mp4
  - Movie\_S2\_Ayranteken.mp4
  - Movie\_S3\_Bozdag\_gobu.mp4
  - Movie\_S4\_Bozdag\_Guzdek.mp4
  - Movie\_S5\_Cheilaktharma.mp4
  - Movie\_S6\_Durandag.mp4
  - Movie\_S7\_East\_Cheildag.mp4
  - Movie\_S8\_Garyja.mp4
  - Movie\_S9\_Goturlug.mp4
  - S\_google\_earth\_pins\_MVs.kmz
  - Supplement\_final.pdf

The copyright of individual parts of the supplement might differ from the article licence.
